# Supplementary material for: Myeloid-specific SIRT1 Deletion Aggravates Hepatic Inflammation and Steatosis in High-fat Diet-fed Mice
Source: PubMed Central journal article supplement — Korean J Physiol Pharmacol. 2015 Aug 20;19(5):451–60. doi: 10.4196/kjpp.2015.19.5.451 (PMC4553405; doi:10.4196/kjpp.2015.19.5.451), 2015-08-20
Supplement: kjpp-19-451-s001.pdf [file kjpp-19-451-s001.pdf]

**Supplementary Table 1.** List of primary antibodies

| Antibody                   | Company        | Catalog No. | Dilution      | Applications | Source |
|----------------------------|----------------|-------------|---------------|--------------|--------|
| CD68                       | Santa Cruz     | SC-9139     | 1:100         | IHC          | Rabbit |
| CTGF                       | abcam          | ab6992      | 1:1000, 1:100 | WB, IHC      | Rabbit |
| HMGB1                      | abcam          | ab18256     | 1:1000        | WB           | Rabbit |
| 4-HNE                      | abcam          | ab48506     | 1:1000        | WB           | Mouse  |
| JNK                        | Santa Cruz     | SC-572      | 1:1000        | WB           | Rabbit |
| p-JNK                      | Cell signaling | #9251       | 1:1000        | WB           | Rabbit |
| NF- $\kappa$ Bp65 (acetyl) | abcam          | ab19870     | 1:1000        | WB           | Rabbit |
| RAGE                       | abcam          | ab3611      | 1:1000        | WB           | Rabbit |
| Sirt1                      | Cell signaling | #2028       | 1:1000        | WB           | Rabbit |
| Sirt1                      | Millipore      | #07-131     | 1:1000        | WB           | Rabbit |
| Sirt3                      | abcam          | ab189860    | 1:1000        | WB           | Rabbit |
| $\alpha$ -SMA              | Sigma          | A5228       | 1:1000, 1:100 | WB, IHC      | Mouse  |
| SREBP1                     | BD             | 557036      | 1:1000        | WB           | Mouse  |
| TNF-a                      | Santa Cruz     | SC-80383    | 1:1000        | WB           | Mouse  |
| TNFR1                      | Santa Cruz     | SC-8436     | 1:1000        | WB           | Mouse  |
| VDAC1                      | abcam          | ab15895     | 1:3000        | WB           | Rabbit |
| $\beta$ -actin             | Sigma          | A5441       | 1:3000        | WB           | Mouse  |

WB, western blot; IHC, immunohistochemistry
