# Supplementary material for: Myeloid-specific SIRT1 Deletion Aggravates Hepatic Inflammation and Steatosis in High-fat Diet-fed Mice
Source: PubMed Central journal article supplement — Korean J Physiol Pharmacol. 2015 Aug 20;19(5):451–60. doi: 10.4196/kjpp.2015.19.5.451 (PMC4553405; doi:10.4196/kjpp.2015.19.5.451), 2015-08-20
Supplement: kjpp-19-451-s002.pdf [file kjpp-19-451-s002.pdf]

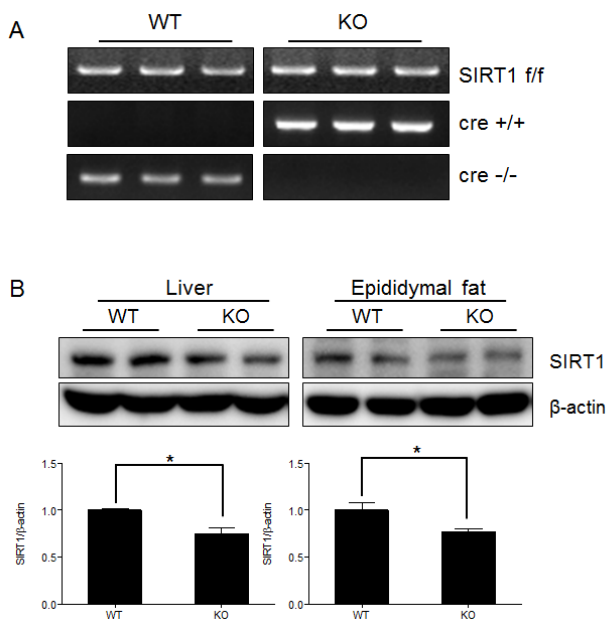

**Supplementary Fig. 1.** Myeloid-specific SIRT1 deletion decreases SIRT1 expression (A) PCR genotyping results from tail DNA. (B) Western blots of SIRT1 in liver and epididymal fat homogenates from WT and KO mice. Band intensity was normalized to  $\beta$ -actin. Data are presented as mean $\pm$ SEM. \* $p$ <0.05 for WT versus KO mice.
