# Supplementary material for: Myeloid-specific SIRT1 Deletion Aggravates Hepatic Inflammation and Steatosis in High-fat Diet-fed Mice
Source: PubMed Central journal article supplement — Korean J Physiol Pharmacol. 2015 Aug 20;19(5):451–60. doi: 10.4196/kjpp.2015.19.5.451 (PMC4553405; doi:10.4196/kjpp.2015.19.5.451), 2015-08-20
Supplement: kjpp-19-451-s003.pdf [file kjpp-19-451-s003.pdf]

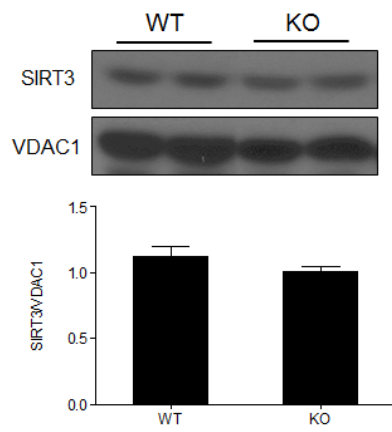

**Supplementary Fig. 2.** SIRT3 expression in KO mice. Western blots of SIRT3 in liver mitochondria from WT and KO mice. Band intensity was normalized to voltage-dependent anion channel 1(VDAC1). Data are presented as mean±SEM. \* $p < 0.05$  for WT versus KO mice.
